# Supplementary material for: Comparative genomic analysis of Paenibacillus sp. SSG-1 and its closely related strains reveals the effect of glycometabolism on environmental adaptation
Source: PubMed Central journal article supplement (PMC5516027; doi:10.1038/s41598-017-06160-9), 2017-07-18
Supplement: 41598_2017_6160_MOESM1_ESM.pdf [file 41598_2017_6160_MOESM1_ESM.pdf]

## Supplementary Information for

### **Comparative genomic analysis of *Paenibacillus* sp. SSG-1 and its closely related strains reveals the effect of glycometabolism on environmental adaptation**

Hui Xu<sup>1+</sup>, Shishang Qin<sup>1+</sup>, Yanhong Lan<sup>1</sup>, Mengjia Liu<sup>1</sup>, Xiyue Cao<sup>2</sup>, Dairong Qiao<sup>1</sup>, Yu Cao<sup>1\*</sup>, Yi Cao<sup>1\*</sup>

<sup>1</sup>Microbiology and Metabolic Engineering of Key Laboratory of Sichuan Province, College of Life Science, Sichuan University, Chengdu, 610065, P. R. China

<sup>2</sup>College of Food Science, Northeast Agricultural University, Harbin, 150030, P. R. China

<sup>+</sup>These authors contributed equally to this work

<sup>\*</sup>Corresponding author

Correspondence addresses: geneium@scu.edu.cn, caoyu1984@163.com

## Contents

**Table S1.** The completeness assignment of gene sets used in the present study.

**Table S2.** The GO function enrichment of *Paenibacillus* sp. SSG-1 genes in core genome.

**Table S3.** General comparison of codon usage between the 7.40-7.55 M region with the global genome of *Paenibacillus* sp. SSG-1.

**Table S4.** The GO function enrichment of *Paenibacillus* sp. SSG-1 genes located in the 7.40-7.55 M region.

**Figure S1.** Clustering distribution of genes in each strain.

**Figure S2.** Overview of functional distribution based on COG assignment.

**Figure S3.** The 16S tree of *Paenibacillus* based on the neighbour-joining method.

**Figure S4.** Schematic representation of gain, lose, expansion and reduction.

In addition, we provided following datasets in another separate Excel file.

**Dataset S1.** The information on the strains used in the present study.

**Dataset S2.** The pairwise identity of 16S rDNA.

**Dataset S3.** Functional annotation of the gained glycometabolism-related genes in each strain.

**Table S1. The completeness assignment of gene sets used in the present study.**

| Strain                          | Lineage dataset: firmicutes_odb9 (232 BUSCOs) |       |      |      |       | Lineage dataset: bacillales_odb9 (526 BUSCOs) |       |      |      |      |
|---------------------------------|-----------------------------------------------|-------|------|------|-------|-----------------------------------------------|-------|------|------|------|
|                                 | %C                                            | %S    | %D   | %F   | %M    | %C                                            | %S    | %D   | %F   | %M   |
| <i>P. sp.</i> SSG-1             | 98.80                                         | 96.60 | 2.20 | 0.40 | 0.80  | 97.50                                         | 95.20 | 2.30 | 1.00 | 1.50 |
| <i>P. sp.</i> IHBB-10380        | 99.50                                         | 97.80 | 1.70 | 0.40 | 0.10  | 95.80                                         | 93.50 | 2.30 | 1.50 | 2.70 |
| <i>P. sp.</i> AT5               | 97.90                                         | 96.60 | 1.30 | 0.40 | 1.70  | 95.00                                         | 93.30 | 1.70 | 1.70 | 3.30 |
| <i>P. sp.</i> Aloe-11           | 96.10                                         | 95.70 | 0.40 | 1.70 | 2.20  | 92.80                                         | 90.90 | 1.90 | 1.70 | 5.50 |
| <i>P. sp.</i> D14               | 97.00                                         | 96.10 | 0.90 | 0.90 | 2.10  | 96.00                                         | 94.90 | 1.10 | 1.10 | 2.90 |
| <i>P. sp.</i> D9                | 97.00                                         | 95.70 | 1.30 | 0.40 | 2.60  | 94.20                                         | 93.20 | 1.00 | 2.50 | 3.30 |
| <i>P. sp.</i> FJAT-22460        | 99.20                                         | 98.30 | 0.90 | 0.40 | 0.40  | 96.80                                         | 94.90 | 1.90 | 1.00 | 2.20 |
| <i>P. sp.</i> GD11              | 97.90                                         | 96.60 | 1.30 | 0.00 | 2.10  | 93.30                                         | 91.60 | 1.70 | 1.30 | 5.40 |
| <i>P. sp.</i> FSL-H7-0357       | 99.60                                         | 98.70 | 0.90 | 0.40 | 0.00  | 96.90                                         | 95.80 | 1.10 | 1.50 | 1.60 |
| <i>P. sp.</i> FSL-H7-0737       | 100.00                                        | 99.10 | 0.90 | 0.00 | 0.00  | 96.50                                         | 95.20 | 1.30 | 1.70 | 1.80 |
| <i>P. sp.</i> HGH0039           | 97.80                                         | 97.40 | 0.40 | 0.40 | 1.80  | 97.50                                         | 95.20 | 2.30 | 1.00 | 1.50 |
| <i>P. sp.</i> HW567             | 100.00                                        | 99.60 | 0.40 | 0.00 | 0.00  | 97.10                                         | 95.60 | 1.50 | 1.10 | 1.80 |
| <i>P. sp.</i> J14               | 99.50                                         | 99.10 | 0.40 | 0.00 | 0.50  | 98.10                                         | 97.70 | 0.40 | 0.80 | 1.10 |
| <i>P. sp.</i> JDR-2             | 99.50                                         | 99.10 | 0.40 | 0.00 | 0.50  | 95.30                                         | 93.00 | 2.30 | 1.70 | 3.00 |
| <i>P. sp.</i> FSL-P4-0081       | 99.20                                         | 98.30 | 0.90 | 0.40 | 0.40  | 96.20                                         | 94.70 | 1.50 | 1.90 | 1.90 |
| <i>P. alginolyticus</i> DSM5050 | 98.70                                         | 97.80 | 0.90 | 0.40 | 0.90  | 97.90                                         | 95.40 | 2.50 | 0.80 | 1.30 |
| <i>P. algorifonticola</i> XJ259 | 98.70                                         | 97.80 | 0.90 | 0.40 | 0.90  | 96.40                                         | 95.10 | 1.30 | 2.10 | 1.50 |
| <i>P. assamensis</i> DSM18201   | 99.50                                         | 99.10 | 0.40 | 0.00 | 0.50  | 96.20                                         | 95.40 | 0.80 | 1.30 | 2.50 |
| <i>P. barengoltzii</i> G22      | 99.50                                         | 99.10 | 0.40 | 0.00 | 0.50  | 97.70                                         | 97.30 | 0.40 | 1.00 | 1.30 |
| <i>P. beijingensis</i> DSM24997 | 98.30                                         | 96.60 | 1.70 | 0.90 | 0.80  | 95.40                                         | 92.40 | 3.00 | 1.50 | 3.10 |
| <i>P. borealis</i> DSM13188     | 99.20                                         | 98.30 | 0.90 | 0.90 | -0.10 | 95.80                                         | 93.90 | 1.90 | 2.30 | 1.90 |
| <i>P. chondroitinus</i> OK414   | 99.20                                         | 98.30 | 0.90 | 0.40 | 0.40  | 98.10                                         | 94.30 | 3.80 | 1.00 | 0.90 |
| <i>P. daejeonensis</i> DSM15491 | 100.00                                        | 99.10 | 0.90 | 0.00 | 0.00  | 96.20                                         | 94.50 | 1.70 | 1.30 | 2.50 |
| <i>P. dauci</i> H9              | 99.60                                         | 98.30 | 1.30 | 0.00 | 0.40  | 95.80                                         | 94.70 | 1.10 | 2.10 | 2.10 |

|                                 |        |       |      |      |      |       |       |      |      |      |
|---------------------------------|--------|-------|------|------|------|-------|-------|------|------|------|
| <i>P. durus</i> ATCC35681       | 99.10  | 98.70 | 0.40 | 0.90 | 0.00 | 96.30 | 95.20 | 1.10 | 2.50 | 1.20 |
| <i>P. durus</i> DSM1735         | 98.70  | 97.80 | 0.90 | 0.90 | 0.40 | 96.70 | 95.20 | 1.50 | 1.90 | 1.40 |
| <i>P. fonticola</i> DSM21315    | 99.50  | 99.10 | 0.40 | 0.00 | 0.50 | 96.60 | 95.10 | 1.50 | 1.10 | 2.30 |
| <i>P. ginsengihumi</i> DSM21568 | 97.90  | 96.60 | 1.30 | 1.70 | 0.40 | 94.50 | 92.80 | 1.70 | 2.30 | 3.20 |
| <i>P. graminis</i> DSM15220     | 100.00 | 99.10 | 0.90 | 0.00 | 0.00 | 96.40 | 95.10 | 1.30 | 2.30 | 1.30 |
| <i>P. harenae</i> DSM16959      | 99.50  | 97.80 | 1.70 | 0.00 | 0.50 | 96.40 | 94.50 | 1.90 | 1.10 | 2.50 |
| <i>P. larvae</i> DSM25430       | 97.00  | 96.10 | 0.90 | 1.30 | 1.70 | 95.50 | 94.90 | 0.60 | 1.70 | 2.80 |
| <i>P. macerans</i> 8244         | 98.30  | 97.40 | 0.90 | 0.00 | 1.70 | 96.20 | 93.90 | 2.30 | 1.00 | 2.80 |
| <i>P. massiliensis</i> DSM16942 | 100.00 | 99.60 | 0.40 | 0.00 | 0.00 | 97.10 | 95.80 | 1.30 | 1.70 | 1.20 |
| <i>P. mucilaginosus</i> KNP414  | 97.40  | 96.10 | 1.30 | 0.40 | 2.20 | 96.60 | 94.70 | 1.90 | 1.70 | 1.70 |
| <i>P. mucilaginosus</i> 3016    | 93.60  | 92.70 | 0.90 | 1.30 | 5.10 | 92.80 | 91.10 | 1.70 | 1.90 | 5.30 |
| <i>P. mucilaginosus</i> K02     | 98.30  | 97.00 | 1.30 | 0.40 | 1.30 | 97.00 | 94.90 | 2.10 | 1.70 | 1.30 |
| <i>P. odorifer</i> DSM15391     | 100.00 | 99.60 | 0.40 | 0.00 | 0.00 | 96.80 | 96.00 | 0.80 | 1.30 | 1.90 |
| <i>P. panacisoli</i> DSM21345   | 99.50  | 99.10 | 0.40 | 0.00 | 0.50 | 97.30 | 96.20 | 1.10 | 1.50 | 1.20 |
| <i>P. pasadenensis</i> DSM19293 | 97.80  | 97.40 | 0.40 | 0.90 | 1.30 | 95.10 | 93.00 | 2.10 | 2.50 | 2.40 |
| <i>P. peoriae</i> KCTC3763      | 99.60  | 98.70 | 0.90 | 0.40 | 0.00 | 97.50 | 96.40 | 1.10 | 1.10 | 1.40 |
| <i>P. peoriae</i> HS311         | 100.00 | 98.70 | 1.30 | 0.00 | 0.00 | 97.40 | 94.90 | 2.50 | 1.50 | 1.10 |
| <i>P. pinihumi</i> DSM23905     | 100.00 | 98.70 | 1.30 | 0.00 | 0.00 | 95.60 | 93.30 | 2.30 | 1.70 | 2.70 |
| <i>P. polymyxa</i> M1           | 99.60  | 98.70 | 0.90 | 0.40 | 0.00 | 97.50 | 95.80 | 1.70 | 1.50 | 1.00 |
| <i>P. polymyxa</i> SC2          | 99.60  | 98.70 | 0.90 | 0.40 | 0.00 | 97.30 | 95.60 | 1.70 | 1.50 | 1.20 |
| <i>P. polymyxa</i> ATCC842      | 99.60  | 98.30 | 1.30 | 0.40 | 0.00 | 97.70 | 95.80 | 1.90 | 1.30 | 1.00 |
| <i>P. polymyxa</i> A18          | 99.60  | 98.70 | 0.90 | 0.40 | 0.00 | 97.50 | 96.20 | 1.30 | 1.30 | 1.20 |
| <i>P. polymyxa</i> CF05         | 99.60  | 98.30 | 1.30 | 0.40 | 0.00 | 97.50 | 95.60 | 1.90 | 1.50 | 1.00 |
| <i>P. polymyxa</i> Sb3-1        | 99.50  | 99.10 | 0.40 | 0.40 | 0.10 | 97.60 | 96.60 | 1.00 | 1.30 | 1.10 |
| <i>P. polymyxa</i> SQR-21       | 99.10  | 97.80 | 1.30 | 0.40 | 0.50 | 97.10 | 95.20 | 1.90 | 1.50 | 1.40 |
| <i>P. polymyxa</i> EBL06        | 99.60  | 98.30 | 1.30 | 0.40 | 0.00 | 97.30 | 95.20 | 2.10 | 1.50 | 1.20 |
| <i>P. polymyxa</i> CR1          | 98.30  | 97.00 | 1.30 | 0.40 | 1.30 | 94.10 | 91.60 | 2.50 | 1.70 | 4.20 |
| <i>P. polymyxa</i> E681         | 99.60  | 98.70 | 0.90 | 0.00 | 0.40 | 97.30 | 95.60 | 1.70 | 1.50 | 1.20 |

|                                |        |       |      |      |       |       |       |      |      |      |
|--------------------------------|--------|-------|------|------|-------|-------|-------|------|------|------|
| <i>P. riograndensis</i> SBR5   | 100.00 | 99.10 | 0.90 | 0.00 | 0.00  | 96.80 | 95.10 | 1.70 | 1.90 | 1.30 |
| <i>P. sabinae</i> T27          | 97.90  | 96.60 | 1.30 | 0.40 | 1.70  | 96.20 | 94.70 | 1.50 | 1.90 | 1.90 |
| <i>P. sanguinis</i> DSM16941   | 100.00 | 99.60 | 0.40 | 0.00 | 0.00  | 95.60 | 94.30 | 1.30 | 1.70 | 2.70 |
| <i>P. senegalensis</i> JC66    | 97.90  | 97.00 | 0.90 | 0.40 | 1.70  | 94.90 | 93.20 | 1.70 | 1.50 | 3.60 |
| <i>P. stellifer</i> DSM14472   | 99.20  | 98.30 | 0.90 | 0.90 | -0.10 | 96.90 | 95.80 | 1.10 | 1.90 | 1.20 |
| <i>P. taiwanensis</i> DSM18679 | 100.00 | 99.60 | 0.40 | 0.00 | 0.00  | 97.00 | 96.00 | 1.00 | 1.70 | 1.30 |
| <i>P. terrae</i> HPL-003       | 98.70  | 98.30 | 0.40 | 0.40 | 0.90  | 96.00 | 93.90 | 2.10 | 1.70 | 2.30 |
| <i>P. terrigena</i> DSM21567   | 99.60  | 98.70 | 0.90 | 0.00 | 0.40  | 96.80 | 95.10 | 1.70 | 1.70 | 1.50 |
| <i>P. wulumuqiensis</i> Y24    | 99.60  | 98.30 | 1.30 | 0.00 | 0.40  | 96.40 | 94.90 | 1.50 | 1.90 | 1.70 |
| <i>P. sp.</i> FSL-R5-0345      | 100.00 | 99.10 | 0.90 | 0.00 | 0.00  | 96.70 | 95.60 | 1.10 | 1.50 | 1.80 |
| <i>P. sp.</i> FSL-R5-0912      | 100.00 | 99.10 | 0.90 | 0.00 | 0.00  | 96.40 | 94.70 | 1.70 | 1.90 | 1.70 |
| <i>P. sp.</i> FSL-R7-0273      | 99.50  | 99.10 | 0.40 | 0.40 | 0.10  | 96.60 | 96.00 | 0.60 | 1.50 | 1.90 |
| <i>P. sp.</i> FSL-R7-0331      | 99.50  | 99.10 | 0.40 | 0.40 | 0.10  | 96.00 | 95.20 | 0.80 | 1.90 | 2.10 |
| <i>P. sp.</i> Root444D2        | 98.70  | 97.80 | 0.90 | 0.40 | 0.90  | 97.10 | 93.90 | 3.20 | 1.30 | 1.60 |
| <i>P. sp.</i> Root52           | 99.50  | 97.80 | 1.70 | 0.00 | 0.50  | 96.60 | 95.80 | 0.80 | 1.90 | 1.50 |
| <i>P. sp.</i> Soil522          | 99.20  | 98.30 | 0.90 | 0.40 | 0.40  | 96.80 | 94.90 | 1.90 | 1.30 | 1.90 |
| <i>P. sp.</i> Soil750          | 98.30  | 97.00 | 1.30 | 0.40 | 1.30  | 96.80 | 94.50 | 2.30 | 1.30 | 1.90 |
| <i>P. sp.</i> Soil766          | 99.10  | 97.80 | 1.30 | 0.40 | 0.50  | 97.50 | 95.20 | 2.30 | 1.00 | 1.50 |
| <i>P. sp.</i> Soil787          | 98.70  | 97.80 | 0.90 | 0.40 | 0.90  | 98.10 | 95.20 | 2.90 | 0.80 | 1.10 |
| <i>P. sp.</i> UNC217MF         | 100.00 | 98.70 | 1.30 | 0.00 | 0.00  | 98.10 | 96.20 | 1.90 | 1.50 | 0.40 |
| <i>P. sp.</i> UNC451MF         | 99.10  | 97.80 | 1.30 | 0.40 | 0.50  | 97.40 | 94.70 | 2.70 | 0.80 | 1.80 |
| <i>P. sp.</i> UNCCL52          | 100.00 | 98.70 | 1.30 | 0.00 | 0.00  | 97.70 | 95.20 | 2.50 | 1.30 | 1.00 |
| <i>P. sp.</i> URHA0014         | 98.70  | 97.40 | 1.30 | 0.40 | 0.90  | 97.00 | 94.50 | 2.50 | 1.10 | 1.90 |
| <i>P. sp.</i> Y412MC10         | 99.10  | 97.80 | 1.30 | 0.00 | 0.90  | 97.70 | 96.40 | 1.30 | 0.80 | 1.50 |
| <i>B. subtilis</i> 168         | 99.50  | 99.10 | 0.40 | 0.40 | 0.10  | 99.40 | 99.40 | 0.00 | 0.00 | 0.60 |

%C: the percentage of complete BUSCOs; %S: the percentage of complete and singlecopy BUSCOs; %D: the percentage of complete and duplicated BUSCOs; %F: the percentage of fragmented BUSCOs; %M: the percentage of missing BUSCOs.

**Table S2. The GO function enrichment of *Paenibacillus* sp. SSG-1 genes in core genome.**

| <b>GO</b>  | <b>Class</b> | <b>Corrected P-value</b> | <b>Term</b>                                                                                   |
|------------|--------------|--------------------------|-----------------------------------------------------------------------------------------------|
| GO:0003735 | MF           | 0.0000                   | structural constituent of ribosome                                                            |
| GO:0019843 | MF           | 0.0000                   | rRNA binding                                                                                  |
| GO:0003723 | MF           | 0.0000                   | RNA binding                                                                                   |
| GO:0000049 | MF           | 0.0000                   | tRNA binding                                                                                  |
| GO:0000287 | MF           | 0.0000                   | magnesium ion binding                                                                         |
| GO:0005524 | MF           | 0.0000                   | ATP binding                                                                                   |
| GO:0016884 | MF           | 0.0001                   | carbon-nitrogen ligase activity, with glutamine as amido-N-donor                              |
| GO:0016597 | MF           | 0.0001                   | amino acid binding                                                                            |
| GO:0005525 | MF           | 0.0001                   | GTP binding                                                                                   |
| GO:0046872 | MF           | 0.0044                   | metal ion binding                                                                             |
| GO:0003899 | MF           | 0.0046                   | DNA-directed RNA polymerase activity                                                          |
| GO:0046933 | MF           | 0.0060                   | proton-transporting ATP synthase activity, rotational mechanism                               |
| GO:0009982 | MF           | 0.0060                   | pseudouridine synthase activity                                                               |
| GO:0016765 | MF           | 0.0141                   | transferase activity, transferring alkyl or aryl (other than methyl) groups                   |
| GO:0003924 | MF           | 0.0179                   | GTPase activity                                                                               |
| GO:0008175 | MF           | 0.0253                   | tRNA methyltransferase activity                                                               |
| GO:0016881 | MF           | 0.0266                   | acid-amino acid ligase activity                                                               |
| GO:0008649 | MF           | 0.0371                   | rRNA methyltransferase activity                                                               |
| GO:0016624 | MF           | 0.0371                   | oxidoreductase activity, acting on the aldehyde or oxo group of donors, disulfide as acceptor |
| GO:0003678 | MF           | 0.0371                   | DNA helicase activity                                                                         |
| GO:0004812 | MF           | 0.0416                   | aminoacyl-tRNA ligase activity                                                                |
| GO:0050661 | MF           | 0.0433                   | NADP binding                                                                                  |
| GO:0008135 | MF           | 0.0480                   | translation factor activity, RNA binding                                                      |
| GO:0042254 | BP           | 0.0000                   | ribosome biogenesis                                                                           |
| GO:0006412 | BP           | 0.0000                   | translation                                                                                   |
| GO:0006144 | BP           | 0.0001                   | purine nucleobase metabolic process                                                           |
| GO:0006364 | BP           | 0.0001                   | rRNA processing                                                                               |

|            |    |        |                                                        |
|------------|----|--------|--------------------------------------------------------|
| GO:0044205 | BP | 0.0001 | 'de novo' UMP biosynthetic process                     |
| GO:0008654 | BP | 0.0001 | phospholipid biosynthetic process                      |
| GO:0006206 | BP | 0.0017 | pyrimidine nucleobase metabolic process                |
| GO:0006189 | BP | 0.0018 | 'de novo' IMP biosynthetic process                     |
| GO:0009094 | BP | 0.0026 | L-phenylalanine biosynthetic process                   |
| GO:0042777 | BP | 0.0032 | plasma membrane ATP synthesis coupled proton transport |
| GO:0006094 | BP | 0.0032 | gluconeogenesis                                        |
| GO:0016226 | BP | 0.0032 | iron-sulfur cluster assembly                           |
| GO:0006096 | BP | 0.0042 | glycolytic process                                     |
| GO:0046656 | BP | 0.0042 | folic acid biosynthetic process                        |
| GO:0000162 | BP | 0.0050 | tryptophan biosynthetic process                        |
| GO:0006571 | BP | 0.0050 | tyrosine biosynthetic process                          |
| GO:0006281 | BP | 0.0057 | DNA repair                                             |
| GO:0006536 | BP | 0.0057 | glutamate metabolic process                            |
| GO:0001522 | BP | 0.0057 | pseudouridine synthesis                                |
| GO:0006730 | BP | 0.0057 | one-carbon metabolic process                           |
| GO:0006260 | BP | 0.0057 | DNA replication                                        |
| GO:0009306 | BP | 0.0065 | protein secretion                                      |
| GO:0015940 | BP | 0.0090 | pantothenate biosynthetic process                      |
| GO:0008033 | BP | 0.0115 | tRNA processing                                        |
| GO:0006457 | BP | 0.0115 | protein folding                                        |
| GO:0019643 | BP | 0.0115 | reductive tricarboxylic acid cycle                     |
| GO:0090502 | BP | 0.0115 | RNA phosphodiester bond hydrolysis, endonucleolytic    |
| GO:0051252 | BP | 0.0147 | regulation of RNA metabolic process                    |
| GO:0015994 | BP | 0.0159 | chlorophyll metabolic process                          |
| GO:0006400 | BP | 0.0189 | tRNA modification                                      |
| GO:0071973 | BP | 0.0189 | bacterial-type flagellum-dependent cell motility       |
| GO:0006526 | BP | 0.0207 | arginine biosynthetic process                          |
| GO:0046653 | BP | 0.0207 | tetrahydrofolate metabolic process                     |
| GO:0006522 | BP | 0.0250 | alanine metabolic process                              |

|            |    |        |                                                               |
|------------|----|--------|---------------------------------------------------------------|
| GO:0006418 | BP | 0.0288 | tRNA aminoacylation for protein translation                   |
| GO:0043244 | BP | 0.0343 | regulation of protein complex disassembly                     |
| GO:0019856 | BP | 0.0343 | pyrimidine nucleobase biosynthetic process                    |
| GO:0006935 | BP | 0.0381 | chemotaxis                                                    |
| GO:0044780 | BP | 0.0381 | bacterial-type flagellum assembly                             |
| GO:0006119 | BP | 0.0381 | oxidative phosphorylation                                     |
| GO:0009097 | BP | 0.0438 | isoleucine biosynthetic process                               |
| GO:0032259 | BP | 0.0438 | methylation                                                   |
| GO:0000902 | BP | 0.0468 | cell morphogenesis                                            |
| GO:0005737 | CC | 0.0000 | cytoplasm                                                     |
| GO:0005840 | CC | 0.0000 | ribosome                                                      |
| GO:0015935 | CC | 0.0001 | small ribosomal subunit                                       |
| GO:0043234 | CC | 0.0014 | protein complex                                               |
| GO:0005730 | CC | 0.0086 | nucleolus                                                     |
| GO:0015934 | CC | 0.0127 | large ribosomal subunit                                       |
| GO:0044464 | CC | 0.0262 | cell part                                                     |
| GO:1990234 | CC | 0.0370 | transferase complex                                           |
| GO:0044424 | CC | 0.0370 | intracellular part                                            |
| GO:0045261 | CC | 0.0370 | proton-transporting ATP synthase complex, catalytic core F(1) |
| GO:0070013 | CC | 0.0424 | intracellular organelle lumen                                 |

---



**Table S3. General comparison of codon usage between the 7.40-7.55 M region with the global genome of *Paenibacillus* sp. SSG-1.**

| Amino acid | Code | Frequency |             | RSCU   |             |
|------------|------|-----------|-------------|--------|-------------|
|            |      | Global    | 7.40-7.55 M | Global | 7.40-7.55 M |
| A          | GCA  | 0.1530    | 0.2890      | 0.6121 | 1.1561      |
|            | GCC  | 0.3686    | 0.1984      | 1.4745 | 0.7936      |
|            | GCG  | 0.3312    | 0.2519      | 1.3247 | 1.0077      |
|            | GCT  | 0.1472    | 0.2607      | 0.5887 | 1.0427      |
| C          | TGC  | 0.7639    | 0.4888      | 1.5277 | 0.9777      |
|            | TGT  | 0.2361    | 0.5112      | 0.4723 | 1.0223      |
| D          | GAC  | 0.5081    | 0.2901      | 1.0163 | 0.5803      |
|            | GAT  | 0.4919    | 0.7099      | 0.9837 | 1.4197      |
| E          | GAA  | 0.5048    | 0.5272      | 1.0096 | 1.0544      |
|            | GAG  | 0.4952    | 0.4728      | 0.9904 | 0.9456      |
| F          | TTC  | 0.5065    | 0.4914      | 1.0131 | 0.9827      |
|            | TTT  | 0.4935    | 0.5086      | 0.9869 | 1.0173      |
| G          | GGA  | 0.2221    | 0.2819      | 0.8884 | 1.1274      |
|            | GGC  | 0.4325    | 0.3014      | 1.7300 | 1.2057      |
|            | GGG  | 0.2043    | 0.1594      | 0.8171 | 0.6377      |
|            | GGT  | 0.1411    | 0.2573      | 0.5645 | 1.0292      |
| H          | CAC  | 0.3693    | 0.2533      | 0.7387 | 0.5066      |
|            | CAT  | 0.6307    | 0.7467      | 1.2613 | 1.4934      |
| I          | ATA  | 0.0690    | 0.1498      | 0.2071 | 0.4495      |
|            | ATC  | 0.5685    | 0.3249      | 1.7056 | 0.9748      |
|            | ATT  | 0.3624    | 0.5252      | 1.0873 | 1.5757      |
| K          | AAA  | 0.4621    | 0.4461      | 0.9243 | 0.8921      |
|            | AAG  | 0.5379    | 0.5539      | 1.0757 | 1.1079      |
| L          | CTA  | 0.0275    | 0.0798      | 0.1651 | 0.4787      |
|            | CTC  | 0.1555    | 0.0876      | 0.9327 | 0.5256      |
|            | CTG  | 0.4910    | 0.2609      | 2.9460 | 1.5655      |

|   |     |        |        |        |        |
|---|-----|--------|--------|--------|--------|
|   | CTT | 0.1247 | 0.1978 | 0.7482 | 1.1871 |
|   | TTA | 0.0570 | 0.1237 | 0.3422 | 0.7423 |
|   | TTG | 0.1443 | 0.2501 | 0.8659 | 1.5008 |
| M | ATG | 1.0000 | 1.0000 | 1.0000 | 1.0000 |
| N | AAC | 0.6022 | 0.3626 | 1.2045 | 0.7251 |
|   | AAT | 0.3978 | 0.6374 | 0.7955 | 1.2749 |
| P | CCA | 0.0959 | 0.2415 | 0.3837 | 0.9661 |
|   | CCC | 0.1697 | 0.1144 | 0.6788 | 0.4577 |
|   | CCG | 0.5726 | 0.3692 | 2.2903 | 1.4767 |
|   | CCT | 0.1618 | 0.2749 | 0.6472 | 1.0995 |
| Q | CAA | 0.2944 | 0.4910 | 0.5889 | 0.9820 |
|   | CAG | 0.7056 | 0.5090 | 1.4111 | 1.0180 |
| R | AGA | 0.0893 | 0.1867 | 0.5358 | 1.1204 |
|   | AGG | 0.0839 | 0.0864 | 0.5035 | 0.5185 |
|   | CGA | 0.0626 | 0.1677 | 0.3757 | 1.0062 |
|   | CGC | 0.2947 | 0.1862 | 1.7681 | 1.1173 |
|   | CGG | 0.3353 | 0.1651 | 2.0120 | 0.9907 |
|   | CGT | 0.1342 | 0.2078 | 0.8050 | 1.2469 |
| S | AGC | 0.2980 | 0.2075 | 1.7882 | 1.2448 |
|   | AGT | 0.0659 | 0.1633 | 0.3951 | 0.9799 |
|   | TCA | 0.0674 | 0.1264 | 0.4041 | 0.7584 |
|   | TCC | 0.2636 | 0.1790 | 1.5815 | 1.0738 |
|   | TCG | 0.2295 | 0.1653 | 1.3769 | 0.9920 |
|   | TCT | 0.0757 | 0.1585 | 0.4541 | 0.9510 |
| T | ACA | 0.1283 | 0.3041 | 0.5130 | 1.2163 |
|   | ACC | 0.3348 | 0.1888 | 1.3394 | 0.7554 |
|   | ACG | 0.4575 | 0.3306 | 1.8300 | 1.3224 |
|   | ACT | 0.0794 | 0.1765 | 0.3176 | 0.7060 |
| V | GTA | 0.1453 | 0.2426 | 0.5814 | 0.9705 |
|   | GTC | 0.3286 | 0.1857 | 1.3144 | 0.7430 |

|   |     |        |        |        |        |
|---|-----|--------|--------|--------|--------|
|   | GTG | 0.3520 | 0.2973 | 1.4082 | 1.1891 |
|   | GTT | 0.1740 | 0.2744 | 0.6961 | 1.0975 |
| W | TGG | 1.0000 | 1.0000 | 1.0000 | 1.0000 |
| Y | TAC | 0.4927 | 0.3256 | 0.9853 | 0.6511 |
|   | TAT | 0.5073 | 0.6744 | 1.0147 | 1.3489 |

RSCU: relative synonymous codon usage; Global CDS GC3s:0.6630; 7.40-7.55 M region CDS GC3s:0.4844.

**Table S4. The GO function enrichment of *Paenibacillus* sp. SSG-1 genes located in the 7.40-7.55 M region.**

| GO         | Class | Corrected P-value | Term                                |
|------------|-------|-------------------|-------------------------------------|
| GO:0004565 | MF    | 0.0085            | beta-galactosidase activity         |
| GO:0008484 | MF    | 0.0391            | sulfuric ester hydrolase activity   |
| GO:0006012 | BP    | 0.0111            | galactose metabolic process         |
| GO:0006687 | BP    | 0.0177            | glycosphingolipid metabolic process |
| GO:0006027 | BP    | 0.0177            | glycosaminoglycan catabolic process |
| GO:0009341 | CC    | 0.0009            | beta-galactosidase complex          |



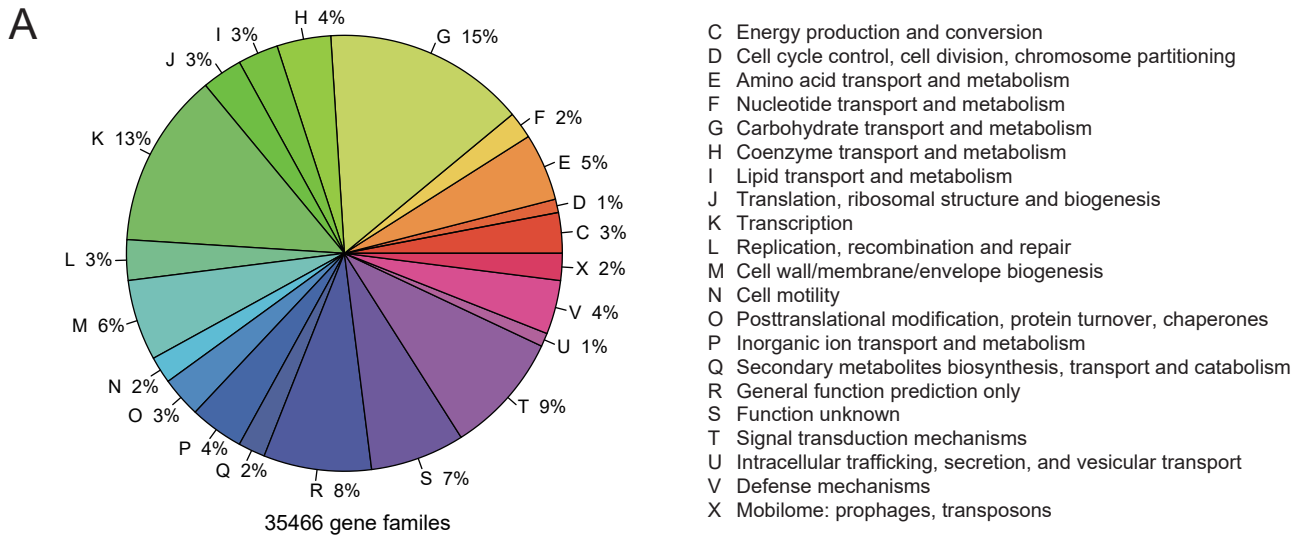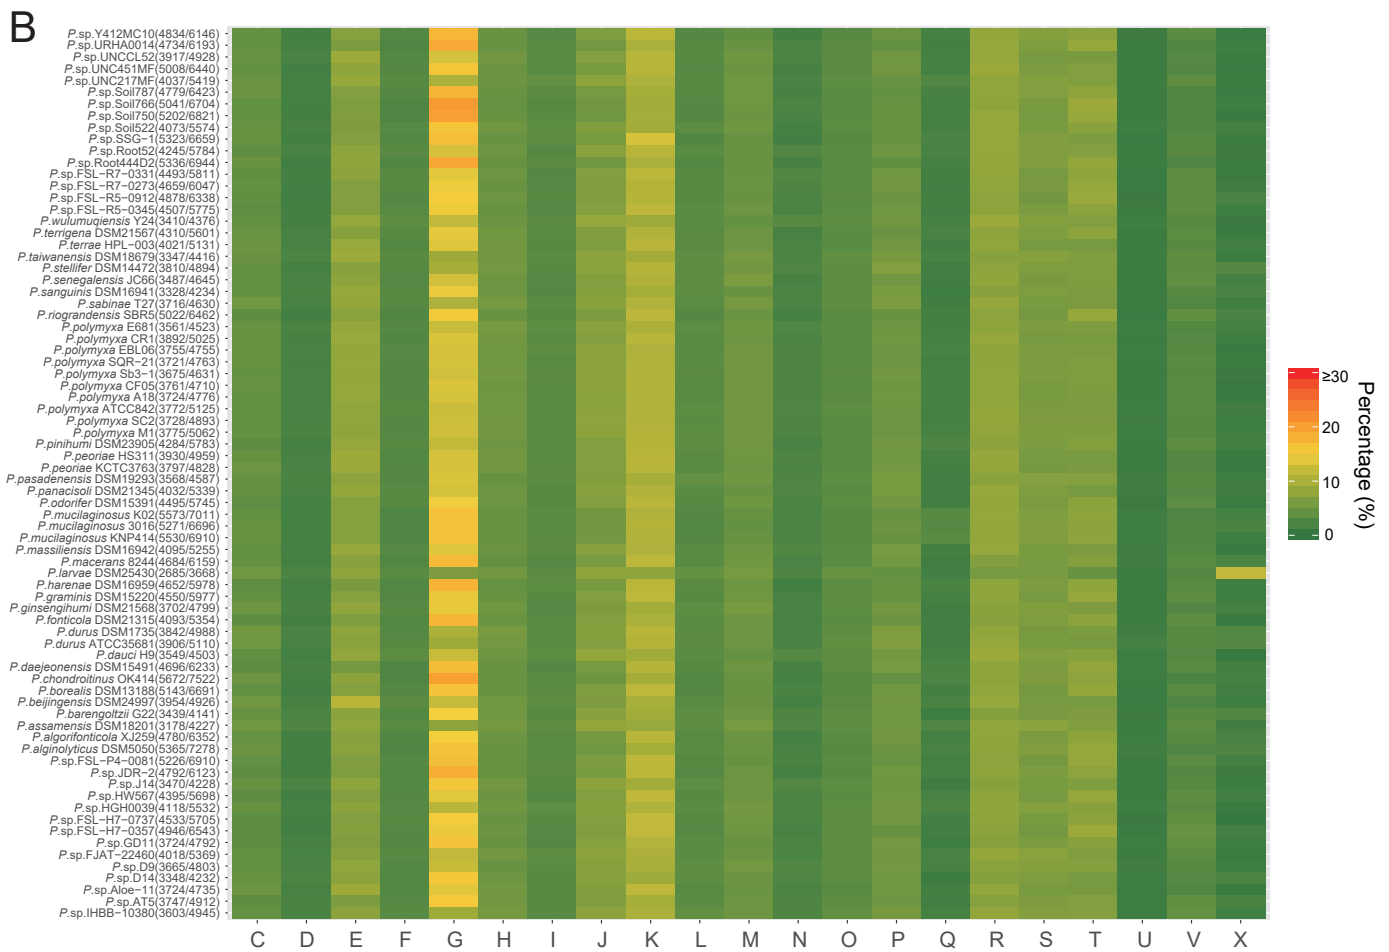

**Figure S2. Overview of functional distribution based on COG assignment.**

(A) Functional distribution of the COG assigned gene families in the pan-genome.

(B) Functional distribution of the COG assigned genes in each strain.



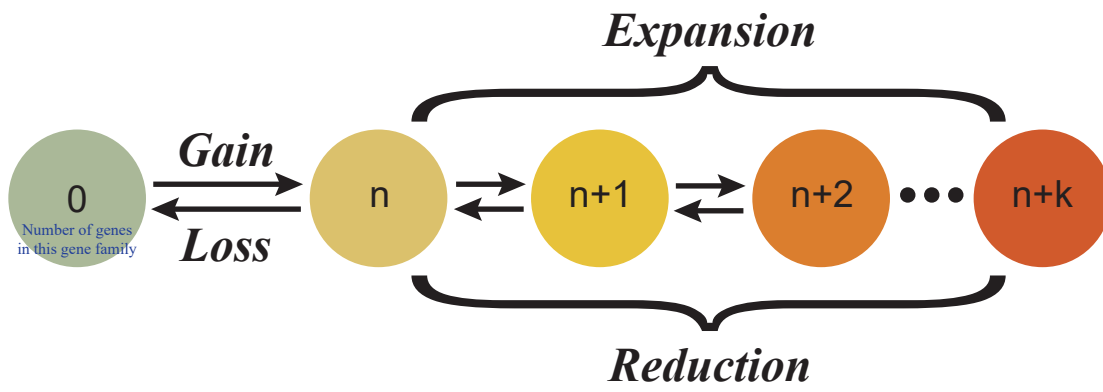

Figure S4. Schematic representation of gain, loss, expansion and reduction.
